# Supplementary material for: Understanding extreme fast charge limitations in carbonate mixtures
Source: Royal Society of Chemistry journal article supplement (doi:10.1039/d0ta10166d), 2021-01-01
Supplement: d0ta10166d1.pdf [file d0ta10166d1.pdf]

### S1. Calculated Diffusivity Values

Cross Diffusivity Terms ( $D_{ij}$ ) computed from Self Diffusivity Values ( $D_{ii}$ ) using Equation 2. Self-Diffusivity values are calculated from molecular dynamics trajectories using Equation 1. Standard deviations are shown in parenthesis.

| System A | EC                     | EMC                    | Li+                    | PF6-                   |
|----------|------------------------|------------------------|------------------------|------------------------|
| EC       | 3.80E-10<br>(1.97E-12) | 3.75E-10               | 1.30E-10               | 2.05E-10               |
| EMC      | 3.75E-10               | 3.64E-10<br>(3.35e-12) | 1.26E-10               | 2.03E-10               |
| Li+      | 1.30E-10               | 1.26E-10               | 1.23E-10<br>(8.58E-12) | 1.62E-10               |
| PF6-     | 2.05E-10               | 2.03E-10               | 1.62E-10               | 2.00E-10<br>(1.83e-11) |

| System B | EC                     | EMC                    | Li+                    | PF6-                   |
|----------|------------------------|------------------------|------------------------|------------------------|
| EC       | 2.47E-10<br>(2.36E-12) | 2.31E-10               | 1.01E-10               | 1.52E-10               |
| EMC      | 2.31E-10               | 1.98E-10<br>(1.44E-12) | 8.87E-11               | 1.43E-10               |
| Li+      | 1.01E-10               | 8.87E-11               | 8.10E-11<br>(1.16E-12) | 1.10E-10               |
| PF6-     | 1.52E-10               | 1.43E-10               | 1.10E-10               | 1.39E-10<br>(7.71E-12) |

| System C | EC                     | EMC                    | Li+                    | PF6-                   |
|----------|------------------------|------------------------|------------------------|------------------------|
| EC       | 1.33E-10<br>(3.26E-12) | 1.20E-10               | 6.19E-11               | 9.50E-11               |
| EMC      | 1.20E-10               | 9.41E-11<br>(9.21E-13) | 4.83E-11               | 8.55E-11               |
| Li+      | 6.19E-11               | 4.83E-11               | 4.18E-11<br>(1.16E-12) | 6.31E-11               |
| PF6-     | 9.50E-11               | 8.55E-11               | 6.31E-11               | 8.43E-11<br>(2.83E-12) |

| System D | EC                     | EMC                    | Li+                    | PF6-                   |
|----------|------------------------|------------------------|------------------------|------------------------|
| EC       | 2.87E-11<br>(1.47E-12) | 2.48E-11               | 1.62E-11               | 2.04E-11               |
| EMC      | 2.48E-11               | 1.71E-11<br>(1.73E-12) | 1.09E-11               | 1.60E-11               |
| Li+      | 1.62E-11               | 1.09E-11               | 9.14E-12<br>(4.59E-13) | 1.24E-11               |
| PF6-     | 2.04E-11               | 1.60E-11               | 1.24E-11               | 1.57E-11<br>(7.04E-13) |

Standard deviations were calculated using block averaging the mean squared displacement from PyLAT across 20 different intervals of 5 ns each. For the 25 ns long simulation with NVT ensemble, the slope of MSD was obtained for 0 to 5 ns, 1 to 6 ns, 2 to 7 ns etc.

## S2. Amber format prep files obtained from Antechamber

### EC.prep

```
-----  
      0      0      2  
  
This is a remark line  
molecule.res  
EC      INT      0  
CORRECT      OMIT DU      BEG  
0.0000  
  1  DUMM  DU      M      0  -1  -2      0.000      .0      .0      .00000  
  2  DUMM  DU      M      1   0  -1      1.449      .0      .0      .00000  
  3  DUMM  DU      M      2   1   0      1.523     111.21      .0      .00000  
  4  O1     os      M      3   2   1      1.540     111.208    -180.000    -0.424941  
  5  C1     c3      M      4   3   2      1.437      97.800     105.315     0.089081  
  6  H1     h1      E      5   4   3      1.093     108.651    -167.677     0.075335  
  7  H2     h1      E      5   4   3      1.089     108.731     -48.090     0.075335  
  8  C2     c3      M      5   4   3      1.531     102.619      72.889     0.089081  
  9  H3     h1      E      8   5   4      1.089     113.925     140.746     0.075335  
 10  H4     h1      E      8   5   4      1.093     112.613     -93.229     0.075335  
 11  O2     os      M      8   5   4      1.437     102.619      23.403    -0.424941  
 12  C3     c2      M     11   8   5      1.362     109.447     -19.883     0.944461  
 13  O3     o       M     12  11   8      1.188     124.951    -171.725    -0.574083  
  
LOOP  
  C3   O1  
  
IMPROPER  
  O3   O2   C3   O1  
  
DONE  
STOP  
-----
```

# EMC.prep

---

0 0 2

This is a remark line

molecule.res

EMC INT 0

CORRECT OMIT DU BEG

0.0000

|    |      |    |   |    |    |    |       |         |          |           |
|----|------|----|---|----|----|----|-------|---------|----------|-----------|
| 1  | DUMM | DU | M | 0  | -1 | -2 | 0.000 | .0      | .0       | .00000    |
| 2  | DUMM | DU | M | 1  | 0  | -1 | 1.449 | .0      | .0       | .00000    |
| 3  | DUMM | DU | M | 2  | 1  | 0  | 1.523 | 111.21  | .0       | .00000    |
| 4  | C3   | c3 | M | 3  | 2  | 1  | 1.540 | 111.208 | -180.000 | -0.345795 |
| 5  | H3   | hc | E | 4  | 3  | 2  | 1.093 | 35.013  | -180.000 | 0.091106  |
| 6  | H4   | hc | E | 4  | 3  | 2  | 1.092 | 88.636  | 54.316   | 0.091106  |
| 7  | H5   | hc | E | 4  | 3  | 2  | 1.093 | 88.584  | -54.200  | 0.091106  |
| 8  | C1   | c3 | M | 4  | 3  | 2  | 1.514 | 144.568 | -179.869 | 0.580567  |
| 9  | H1   | h1 | E | 8  | 4  | 3  | 1.092 | 112.024 | -60.873  | -0.068488 |
| 10 | H2   | h1 | E | 8  | 4  | 3  | 1.092 | 112.052 | 60.710   | -0.068488 |
| 11 | O1   | os | M | 8  | 4  | 3  | 1.450 | 107.358 | 179.917  | -0.619903 |
| 12 | C2   | c2 | M | 11 | 8  | 4  | 1.336 | 115.669 | 179.873  | 1.116925  |
| 13 | O3   | o  | E | 12 | 11 | 8  | 1.207 | 126.178 | 0.052    | -0.657736 |
| 14 | O2   | os | M | 12 | 11 | 8  | 1.340 | 108.090 | -179.993 | -0.431308 |
| 15 | C4   | c3 | M | 14 | 12 | 11 | 1.439 | 115.215 | -179.955 | -0.045680 |
| 16 | H6   | h1 | E | 15 | 14 | 12 | 1.087 | 105.155 | -179.836 | 0.088863  |
| 17 | H7   | h1 | E | 15 | 14 | 12 | 1.091 | 110.513 | -60.467  | 0.088863  |
| 18 | H8   | h1 | E | 15 | 14 | 12 | 1.091 | 110.546 | 60.740   | 0.088863  |

LOOP

IMPROPER

O3 O1 C2 O2

DONE

STOP

---

PF6.pepi

---

0 0 2

This is a remark line

molecule.res

PF6 INT 0

CORRECT OMIT DU BEG

0.0000

|    |      |    |   |   |    |    |       |         |          |           |
|----|------|----|---|---|----|----|-------|---------|----------|-----------|
| 1  | DUMM | DU | M | 0 | -1 | -2 | 0.000 | .0      | .0       | .00000    |
| 2  | DUMM | DU | M | 1 | 0  | -1 | 1.449 | .0      | .0       | .00000    |
| 3  | DUMM | DU | M | 2 | 1  | 0  | 1.523 | 111.21  | .0       | .00000    |
| 4  | F1   | f1 | M | 3 | 2  | 1  | 1.540 | 111.208 | -180.000 | -0.409967 |
| 5  | P1   | p5 | M | 4 | 3  | 2  | 1.622 | 117.868 | -38.941  | 1.459802  |
| 6  | F3   | f2 | E | 5 | 4  | 3  | 1.626 | 89.956  | -112.483 | -0.409967 |
| 7  | F4   | f1 | E | 5 | 4  | 3  | 1.626 | 179.531 | -53.746  | -0.409967 |
| 8  | F5   | f3 | E | 5 | 4  | 3  | 1.627 | 89.893  | -22.795  | -0.409967 |
| 9  | F6   | f3 | E | 5 | 4  | 3  | 1.621 | 90.360  | 157.473  | -0.409967 |
| 10 | F2   | f2 | M | 5 | 4  | 3  | 1.622 | 90.290  | 67.101   | -0.409967 |

LOOP

IMPROPER

DONE

STOP

---
